# Supplementary material for: Naturally Occurring TPE-CA Maintains Gut Microbiota and Bile Acids Homeostasis via FXR Signaling Modulation of the Liver–Gut Axis
Source: PubMed Central journal article supplement (PMC7015895; doi:10.3389/fphar.2020.00012), 2020-02-06
Supplement: DataSheet_1.pdf [file DataSheet_1.pdf]

## Supplementary Material

### Naturally occurred TPE-CA maintain gut microbiota and bile acids

### homeostasis through FXR signaling modulated liver - gut axis

#### Contents:

**Table S1.** The specific contents of 32 phenolic compounds

**Table S2.** The information for MRM parameters.

**Table S3.** Calibration curves, correlation coefficients, linear ranges and LOQs of 16 compounds

**Table S4.** The measurement results of 16 bile acid compounds in liver.

**Table S5.** The measurement results of 16 bile acid compounds in feces.

**Table S6** The raw tags and clean tags in each sample.

**Table S7** The sequences distribution statistics in differences length.

**Table S8** The OTUs statistics in each sample.

**Table S9.** The Chao1 and Shannon of alpha diversity index in each sample.

**Figure S1:** The HPLC-based chemprofile of total phenolic extracts of *Citrus aurantium* L

**Figure S2.** The relative abundance of bacterial phylum in each samples.

**Figure S3.** The relative abundance of bacterial class in each samples.

**Figure S4.** The relative abundance of bacterial order in each samples.

**Figure S5.** The relative abundance of bacterial family in each samples.

**Figure S6.** The relative abundance of bacterial genus in each samples.

**Figure S7.** The genus\_phylogeny for each groups.

**Figure S8.** The co-occurrence network for OTUs.

**Table S1.** The specific contents of 32 phenolic compounds.

| NO | Name                    | Content (ng/ml) |
|----|-------------------------|-----------------|
| 1  | Acacetin                | 770.42          |
| 2  | Apigenin                | 1490.18         |
| 3  | Apigenin-7-O-Glucoside  | 19076.58        |
| 4  | Auraptene               | 1595.34         |
| 5  | Bergapten               | 1653.63         |
| 6  | 5-Demethylnobiletin     | 113856.18       |
| 7  | Diosmetin               | 5558.46         |
| 8  | Diosmetin-7-O-Glucoside | 34483.38        |
| 9  | Diosmin                 | 629279.22       |
| 10 | Eriocitrin              | 2166024.54      |
| 11 | Eriodictyol             | 4218.94         |
| 12 | Hesperetin              | 340966.86       |
| 13 | Hesperidin              | 20603969.13     |
| 14 | Imperatorin             | 874.38          |
| 15 | Isopimpinellin          | 3898.14         |
| 16 | Isosakuranetin          | 792.48          |
| 17 | Kaempferitrin           | 9062.52         |
| 18 | Limonin                 | 97171.56        |
| 19 | Luteolin                | 2591288.19      |
| 20 | Naringenin              | 261388.26       |
| 21 | Naringin                | 61045773.93     |
| 22 | Narirutin               | 17752304.46     |
| 23 | Neohesperidin           | 97244453.52     |
| 24 | Nobiletin               | 2291214.32      |
| 25 | Nomilin                 | 50669.22        |
| 26 | Poncirin                | 520566.96       |

|    |             |            |
|----|-------------|------------|
| 27 | Rhoifolin   | 2631472.98 |
| 28 | Rutin       | 852041.22  |
| 29 | Scoparone   | 4124.04    |
| 30 | Sinensetin  | 256528.62  |
| 31 | Tangeretin  | 3802648.92 |
| 32 | Xanthotoxol | 15009.26   |

**Table S2.** The information for MRM parameters.

| No                         | Compound                   | tR(min) | [M + H] <sup>+</sup><br>(m/z) | MRM<br>Transitions<br>(Precursor <sup>†</sup> →<br>Product) | Fragment<br>or (V) | Collision<br>Energy<br>(eV) |
|----------------------------|----------------------------|---------|-------------------------------|-------------------------------------------------------------|--------------------|-----------------------------|
| Time segments: 0~7.8 min   |                            |         |                               |                                                             |                    |                             |
| 01                         | tauroursodeoxycholic acid  | 2.882   | 498.3                         | 498.3→106.8                                                 | 140                | 73                          |
| 02                         | taurochenodeoxycholic acid | 2.901   | 498.2                         | 498.2→124.2                                                 | 135                | 55                          |
| 03                         | taurocholic acid           | 3.039   | 514.2                         | 514.2→123.8                                                 | 135                | 60                          |
| 04                         | tauroolithocholic acid     | 4.145   | 401.3                         | 401.3→331.3                                                 | 130                | 20                          |
| 05                         | cholic acid                | 5.122   | 407.2                         | 407.2→343.1                                                 | 130                | 40                          |
| 06                         | chenodeoxycholic acid      | 5.706   | 391.2                         | 391.2→373.1                                                 | 175                | 35                          |
| 07                         | ursodeoxycholic acid       | 6.888   | 391.1                         | 391.1→373.1                                                 | 175                | 20                          |
| Time segments: 7.8~16.5min |                            |         |                               |                                                             |                    |                             |
| 08                         | hyodeoxycholic acid        | 9.280   | 391.2                         | 391.2→345.2                                                 | 135                | 30                          |
| 09                         | deoxycholic acid           | 9.306   | 391.2                         | 391.2→283.2                                                 | 150                | 45                          |
| 10                         | beta-muricholic acid       | 9.625   | 407.2                         | 407.2→399.9                                                 | 130                | 40                          |
| 11                         | lithocholic acid           | 11.092  | 375.2                         | 375.2→375.2                                                 | 160                | 50                          |
| 12                         | glycochenodeoxycholic acid | 11.625  | 448.2                         | 448.2→386.3                                                 | 125                | 40                          |

|                            |                           |        |       |             |     |    |
|----------------------------|---------------------------|--------|-------|-------------|-----|----|
| 13                         | glycoursodeoxycholic acid | 12.661 | 448.2 | 448.2→386.1 | 155 | 35 |
| 14                         | glycocholic acid          | 13.669 | 463.1 | 464.2→402.2 | 130 | 40 |
| 15                         | glycohyodeoxycholic acid  | 14.322 | 448.2 | 448.2→386.3 | 115 | 10 |
| Time segments: 16.5~25 min |                           |        |       |             |     |    |
| 16                         | glycolithocholic acid     | 17.593 | 432.3 | 432.3→432.3 | 155 | 20 |

**Table S3.** Standard curves,  $R^2$ , linear range, LOD and LOQ values for 16 compounds.

| No | Compound                   | Standard curve         | $R^2$  | Linear range, (ng/mL) | LLOQ (ng/mL) |
|----|----------------------------|------------------------|--------|-----------------------|--------------|
| 01 | taoursodeoxycholic acid    | $y=54.1x-9.183$        | 0.9973 | 50.00-10200.00        | 5.34         |
| 02 | taurochenodeoxycholic acid | $y=35.75x-6.391$       | 0.9966 | 15.00.00-2850.00      | 7.46         |
| 03 | taurocholic acid           | $y=7.2571x+1.385$<br>7 | 0.9952 | 100.00-30200.00       | 10.52        |
| 04 | tauroolithocholic acid     | $y=7.665x-6.512$       | 0.9987 | 30.00-5500.00         | 7.19         |
| 05 | cholic acid                | $y=2.398x+0.231$       | 0.9952 | 200.00-20480.00       | 24.31        |
| 06 | chenodeoxycholic acid      | $y=139.6x-75.46$       | 0.9919 | 125.00-25000.00       | 83.86        |
| 07 | ursodeoxycholic acid       | $y=7.38x-2.99$         | 0.9954 | 12.50-30000.00        | 5.61         |
| 08 | hyodeoxycholic acid        | $y=17.58x-3.52$        | 0.9948 | 15.00-25000.00        | 5.69         |
| 09 | deoxycholic acid           | $y=23.89x-15.81$       | 0.9948 | 50.00-30000.00        | 34.56        |
| 10 | beta-muricholic acid       | $y=7.04x-4.522$        | 0.9963 | 500.00-20500.00       | 45.32        |
| 11 | lithocholic acid           | $y=9.958x-35.893$      | 0.9977 | 12.00-25000.00        | 6.34         |

|    |                                |                   |        |                |       |
|----|--------------------------------|-------------------|--------|----------------|-------|
| 12 | glycochenodeoxy<br>cholic acid | $y=25.3x-14.4$    | 0.9923 | 50.00-2500.00  | 19.47 |
| 13 | glycoursodeoxych<br>olic acid  | $y=20.3x+17.2$    | 0.9963 | 50.00-18000.00 | 20.87 |
| 14 | glycocholic acid               | $y=15.85x+15.21$  | 0.9963 | 20.00-35000.00 | 12.09 |
| 15 | glycohyodeoxych<br>olic acid   | $y=3.806x-3.026$  | 0.9926 | 50.00-15000.00 | 13.24 |
| 16 | glycolithocholic<br>acid       | $y=124.73x-69.31$ | 0.9997 | 50.00-15000.00 | 29.37 |

**Table S4.** The measurement results of 16 bile acid compounds in liver.

| No | Compound                       | Control (ng/ml)  | Antibiotic (ng/ml) | TPE-CA(ng/ml)    | Probiotic(ng/ml) |
|----|--------------------------------|------------------|--------------------|------------------|------------------|
| 01 | taoursodeoxyc<br>holic acid    | 4782.12±896.4    | 2328.78±346.92     | 3988.36±547.36   | 4418.26±327.19   |
| 02 | taurochenodeox<br>ycholic acid | 8851.25±1023.78  | 12234.26±847.63    | 10105.36±1023.47 | 9196.36±874.61   |
| 03 | taurocholic acid               | 13537.72±1348.47 | 15965.21±1478.62   | 14482.26±1237.81 | 13707.64±1023.67 |
| 04 | tauroolithocholic<br>acid      | 1286.57±95.74    | 783.56±84.63       | 1075.69±56.39    | 1182.69±64.17    |
| 05 | cholic acid                    | 83330.75±1025.49 | 10588.74±964.53    | 8971.54±759.61   | 8673.75±547.62   |
| 06 | chenodeoxychol<br>ic acid      | 4456.78±579.64   | 6346.75±597.42     | 4993.48±504.36   | 4637.26±349.52   |
| 07 | ursodeoxycholic<br>acid        | 2270.26±345.87   | 1134.26±102.36     | 2086.49±89.7     | 2088.12±105.61   |
| 08 | hyodeoxycholic<br>acid         | 109.76±15.62     | 97.20±6.38         | 102.36±12.34     | 105.39±9.68      |
| 09 | deoxycholic acid               | 349.24±26.57     | 208.94±18.36       | 345.97±21.94     | 353.59±14.26     |
| 10 | beta-muricholic<br>acid        | 8549.26±1347.25  | 5548.26±749.64     | 7109.69±648.17   | 8283.54±947.54   |
| 11 | lithocholic acid               | 75.64±7.84       | 43.29±3.67         | 67.59±5.39       | 75.49±13.47      |

|    |                            |                  |                  |                  |                  |
|----|----------------------------|------------------|------------------|------------------|------------------|
| 12 | glycochenodeoxycholic acid | 6785.49±874.36   | 8763.51±701.64   | 7672.39±601.57   | 6852.21±701.49   |
| 13 | glycoursodeoxycholic acid  | 3109.52±347.58   | 2331.96±187.58   | 2953.92±213.47   | 3156.23±472.59   |
| 14 | glycocholic acid           | 11644.57±1456.81 | 15119.57±1367.59 | 12114.29±1269.54 | 11540.32±1056.94 |
| 15 | glycohyodeoxycholic acid   | 2725.67±567.25   | 1179.29±254.67   | 2451.62±159.68   | 2548.51±347.26   |
| 16 | glycolithocholic acid      | 1291.25±12.38    | 749.68±15.67     | 1014.69±1826     | 1164.89±23.67    |

**Table S5.** The measurement results of 16 bile acid compounds in feces.

| No | Compound                   | Control (ng/ml)  | Antibiotic (ng/ml) | TPE-CA(ng/ml)    | Probiotic(ng/ml) |
|----|----------------------------|------------------|--------------------|------------------|------------------|
| 01 | tauroursodeoxycholic acid  | 794.26±57.26     | 193.57±23.57       | 750.24±102.34    | 752.31±97.49     |
| 02 | taurochenodeoxycholic acid | 87.26±5.61       | 570.34±54.68       | 129.54±16.54     | 90.52±24.15      |
| 03 | taurocholic acid           | 1520.39±84.69    | 4276.59±564.62     | 1952.37±364.95   | 1899.62±315.26   |
| 04 | tauroolithocholic acid     | 50.74±10.37      | 69.71±18.62        | 54.39±9.64       | 57.59±14.25      |
| 05 | cholic acid                | 11650.29±784.59  | 8927.52±1026.53    | 10678.26±964.26  | 11201.68±1026.54 |
| 06 | chenodeoxycholic acid      | 9158.71±1071.27  | 5273.48±479.62     | 8563.59±1314.21  | 9158.64±697.16   |
| 07 | ursodeoxycholic acid       | 10021.36±1145.67 | 13538.21±2357.69   | 11419.26±947.54  | 11091.52±1025.49 |
| 08 | hyodeoxycholic acid        | 4759.61±947.68   | 7831.47±247.42     | 5729.47±649.51   | 5205.69±399.42   |
| 09 | deoxycholic acid           | 10211.24±847.26  | 13518.26±1479.36   | 10873.71±743.19  | 9934.57±846.56   |
| 10 | beta-muricholic acid       | 12686.46±1204.36 | 10952.47±947.26    | 11419.28±1257.36 | 11690.53±1159.26 |
| 11 | lithocholic acid           | 13617.59±1056.72 | 9950.64±679.24     | 12610.37±847.94  | 13453.69±1024.62 |

|    |                            |                |                |                |               |
|----|----------------------------|----------------|----------------|----------------|---------------|
| 12 | glycochenodeoxycholic acid | 257.42±12.36   | 175.47±34.57   | 171.36±45.61   | 161.54±34.16  |
| 13 | glycoursodeoxycholic acid  | 70.64±9.47     | 163.53±34.51   | 89.25±15.69    | 83.47±10.38   |
| 14 | glycocholic acid           | 50.54±6.78     | 69.71±6.49     | 54.12±7.16     | 54.67±9.59    |
| 15 | glycohyodeoxycholic acid   | 853.71±64.52   | 2276.57±356.51 | 1250.57±179.54 | 961.58±102.79 |
| 16 | glycolithocholic acid      | 1185.57±132.41 | 404.52±26.51   | 914.52±34.59   | 1081.52±41.26 |

**Table S6.** The raw tags and clean tags in each sample.

| NO | Sample         | Raw tags | Clean tags |
|----|----------------|----------|------------|
| 01 | control 1      | 95654    | 94207      |
| 02 | control 2      | 48141    | 47246      |
| 03 | control 3      | 66487    | 65207      |
| 04 | control 4      | 79365    | 77633      |
| 05 | control 5      | 59503    | 58508      |
| 06 | control 6      | 42010    | 41349      |
| 07 | control 7      | 60365    | 59530      |
| 08 | control 8      | 76919    | 75734      |
| 09 | control 9      | 75575    | 73048      |
| 10 | control 10     | 77178    | 76180      |
| 11 | antibiotics 1  | 31712    | 31218      |
| 12 | antibiotics 2  | 24293    | 23904      |
| 13 | antibiotics3   | 23748    | 23391      |
| 14 | antibiotics 4  | 39213    | 37555      |
| 15 | antibiotics 5  | 45316    | 43081      |
| 16 | antibiotics 6  | 93752    | 86231      |
| 17 | antibiotics 7  | 62060    | 59366      |
| 18 | antibiotics 8  | 27282    | 26774      |
| 19 | antibiotics9   | 32744    | 32263      |
| 20 | antibiotics 10 | 65104    | 62871      |
| 21 | TPE-CA 1       | 138391   | 135891     |
| 22 | TPE-CA 2       | 78091    | 76191      |
| 23 | TPE-CA 3       | 120162   | 116821     |
| 24 | TPE-CA 4       | 77249    | 74327      |
| 25 | TPE-CA 5       | 124106   | 121697     |

|    |              |        |        |
|----|--------------|--------|--------|
| 26 | TPE-CA 6     | 83174  | 80413  |
| 27 | TPE-CA 7     | 131219 | 127120 |
| 28 | TPE-CA 8     | 124181 | 121288 |
| 29 | TPE-CA 9     | 95602  | 93670  |
| 30 | TPE-CA 10    | 57956  | 56399  |
| 31 | probiotic 1  | 77121  | 73470  |
| 32 | probiotic 2  | 118121 | 111438 |
| 33 | probiotic 3  | 198421 | 195495 |
| 34 | probiotic 4  | 68828  | 67949  |
| 35 | probiotic 5  | 62197  | 61493  |
| 36 | probiotic 6  | 251817 | 245856 |
| 37 | probiotic 7  | 237388 | 233363 |
| 38 | probiotic 8  | 116590 | 114175 |
| 39 | probiotic 9  | 181164 | 177208 |
| 40 | probiotic 10 | 143089 | 140946 |

**Table S7.** The sequences distribution statistics in differences length.

| Length (bp) | Sequences |
|-------------|-----------|
| 0-200       | 0         |
| 200-260     | 0         |
| 260-320     | 42        |
| 320-360     | 68        |
| 360-380     | 26        |
| 380-400     | 1088      |
| 400-420     | 2077902   |
| 420-440     | 1441362   |
| 440-460     | 15        |
| 460-480     | 1         |
| 480-500     | 0         |
| 500-520     | 2         |
| 520-540     | 0         |
| 540-560     | 0         |
| 560-600     | 0         |

**Table S8.** The OTUs statistics in each sample.

| NO | Sample    | Final tags | Final OTUs |
|----|-----------|------------|------------|
| 01 | control 1 | 20460      | 501        |



---

|    |                |       |     |
|----|----------------|-------|-----|
| 02 | control 2      | 20460 | 512 |
| 03 | control 3      | 20460 | 555 |
| 04 | control 4      | 20460 | 544 |
| 05 | control 5      | 20460 | 446 |
| 06 | control 6      | 20460 | 526 |
| 07 | control 7      | 20460 | 507 |
| 08 | control 8      | 20460 | 524 |
| 09 | control 9      | 20460 | 491 |
| 10 | control 10     | 20460 | 475 |
| 11 | antibiotics 1  | 20460 | 37  |
| 12 | antibiotics 2  | 20460 | 39  |
| 13 | antibiotics3   | 20460 | 44  |
| 14 | antibiotics 4  | 20460 | 36  |
| 15 | antibiotics 5  | 20460 | 35  |
| 16 | antibiotics 6  | 20460 | 28  |
| 17 | antibiotics 7  | 20460 | 63  |
| 18 | antibiotics 8  | 20460 | 32  |
| 19 | antibiotics9   | 20460 | 46  |
| 20 | antibiotics 10 | 20460 | 65  |
| 21 | TPE-CA 1       | 20460 | 355 |
| 22 | TPE-CA 2       | 20460 | 432 |
| 23 | TPE-CA 3       | 20460 | 464 |
| 24 | TPE-CA 4       | 20460 | 353 |
| 25 | TPE-CA 5       | 20460 | 404 |
| 26 | TPE-CA 6       | 20460 | 383 |
| 27 | TPE-CA 7       | 20460 | 269 |
| 28 | TPE-CA 8       | 20460 | 417 |
| 29 | TPE-CA 9       | 20460 | 261 |
| 30 | TPE-CA 10      | 20460 | 475 |
| 31 | probiotic 1    | 20460 | 429 |
| 32 | probiotic 2    | 20460 | 451 |
| 33 | probiotic 3    | 20460 | 497 |
| 34 | probiotic 4    | 20460 | 550 |
| 35 | probiotic 5    | 20460 | 465 |
| 36 | probiotic 6    | 20460 | 560 |
| 37 | probiotic 7    | 20460 | 534 |
| 38 | probiotic 8    | 20460 | 520 |
| 39 | probiotic 9    | 20460 | 487 |
| 40 | probiotic 10   | 20460 | 482 |

---

**Table S9.** The Chao1 and Shannon of alpha diversity index in each sample.

| NO | Sample         | Chao 1 | Shannon |
|----|----------------|--------|---------|
| 01 | control 1      | 593.12 | 6.87    |
| 02 | control 2      | 585.59 | 6.55    |
| 03 | control 3      | 682.85 | 6.82    |
| 04 | control 4      | 622.44 | 6.95    |
| 05 | control 5      | 520.69 | 6.68    |
| 06 | control 6      | 610.26 | 6.78    |
| 07 | control 7      | 587.72 | 6.75    |
| 08 | control 8      | 612.80 | 6.98    |
| 09 | control 9      | 591.94 | 6.49    |
| 10 | control 10     | 572.83 | 6.58    |
| 11 | antibiotics 1  | 38.69  | 3.18    |
| 12 | antibiotics 2  | 47.95  | 3.57    |
| 13 | antibiotics3   | 48.69  | 3.59    |
| 14 | antibiotics 4  | 45.83  | 2.59    |
| 15 | antibiotics 5  | 35.65  | 3.60    |
| 16 | antibiotics 6  | 31.67  | 3.17    |
| 17 | antibiotics 7  | 78.55  | 3.08    |
| 18 | antibiotics 8  | 45.50  | 3.25    |
| 19 | antibiotics9   | 84.38  | 2.74    |
| 20 | antibiotics 10 | 72.52  | 3.91    |
| 21 | TPE-CA 1       | 458.05 | 6.64    |
| 22 | TPE-CA 2       | 496.30 | 6.89    |
| 23 | TPE-CA 3       | 526.19 | 6.48    |
| 24 | TPE-CA 4       | 396.21 | 6.57    |
| 25 | TPE-CA 5       | 471.19 | 6.65    |
| 26 | TPE-CA 6       | 431.35 | 6.48    |
| 27 | TPE-CA 7       | 334.14 | 5.60    |
| 28 | TPE-CA 8       | 475.07 | 6.61    |
| 29 | TPE-CA 9       | 293.09 | 5.57    |
| 30 | TPE-CA 10      | 531.14 | 6.92    |
| 31 | probiotic 1    | 488.26 | 6.38    |
| 32 | probiotic 2    | 518.45 | 6.47    |
| 33 | probiotic 3    | 571.52 | 6.85    |
| 34 | probiotic 4    | 640.15 | 7.08    |
| 35 | probiotic 5    | 519.84 | 6.77    |

|    |              |        |      |
|----|--------------|--------|------|
| 36 | probiotic 6  | 639.56 | 7.07 |
| 37 | probiotic 7  | 606.17 | 7.14 |
| 38 | probiotic 8  | 609.58 | 6.54 |
| 39 | probiotic 9  | 557.20 | 6.96 |
| 40 | probiotic 10 | 568.22 | 6.71 |

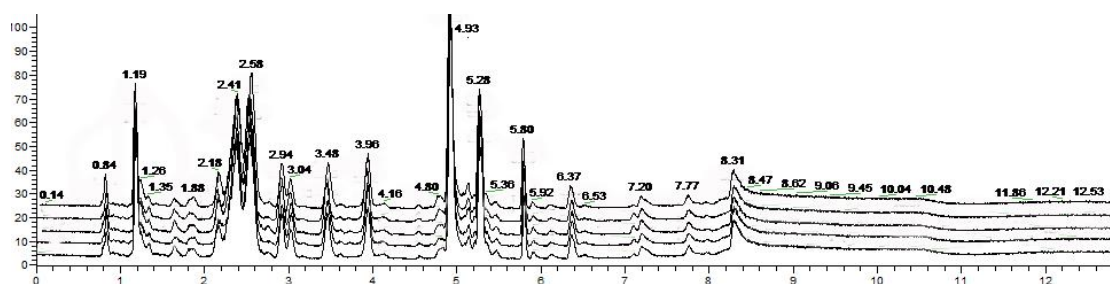

Figure S1. The HPLC-based chemoprofile of *Citrus aurantium* L.

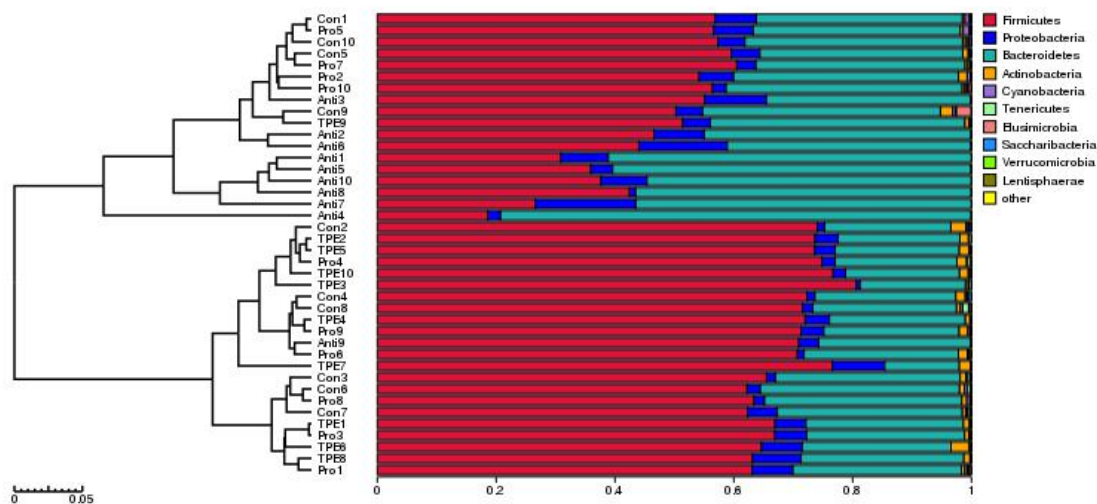

Figure S2. The relative abundance of bacterial phylum in each samples.

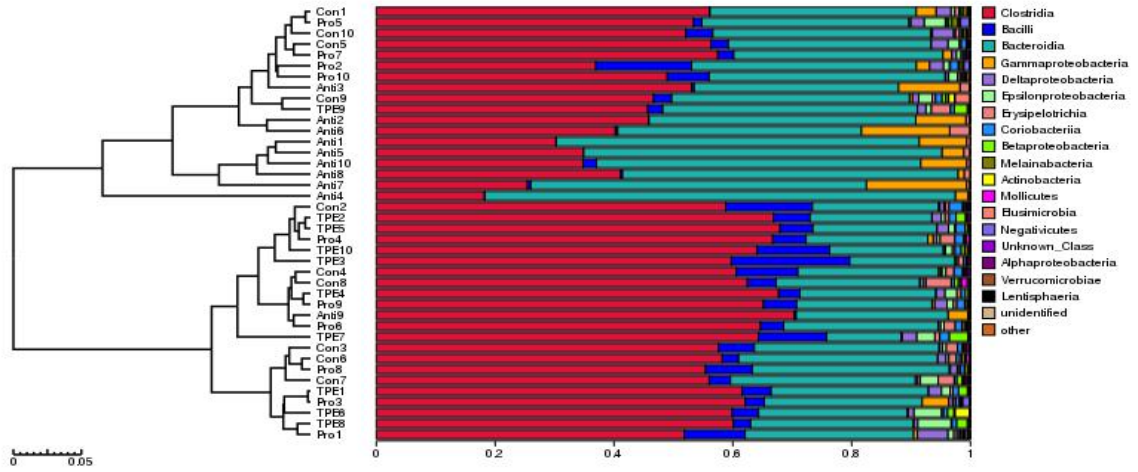

Figure S3. The relative abundance of bacterial class in each samples.

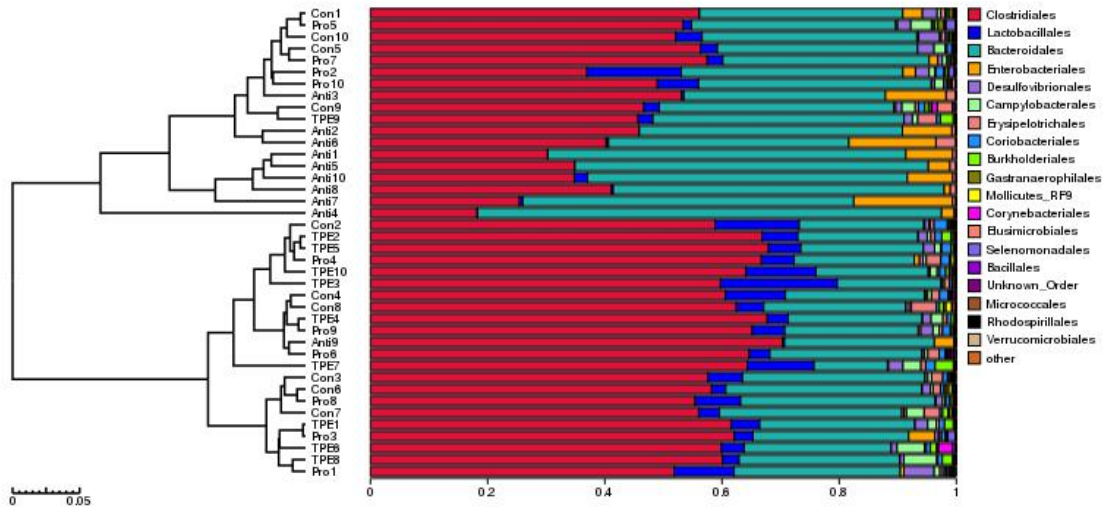

Figure S4. The relative abundance of bacterial order in each samples.

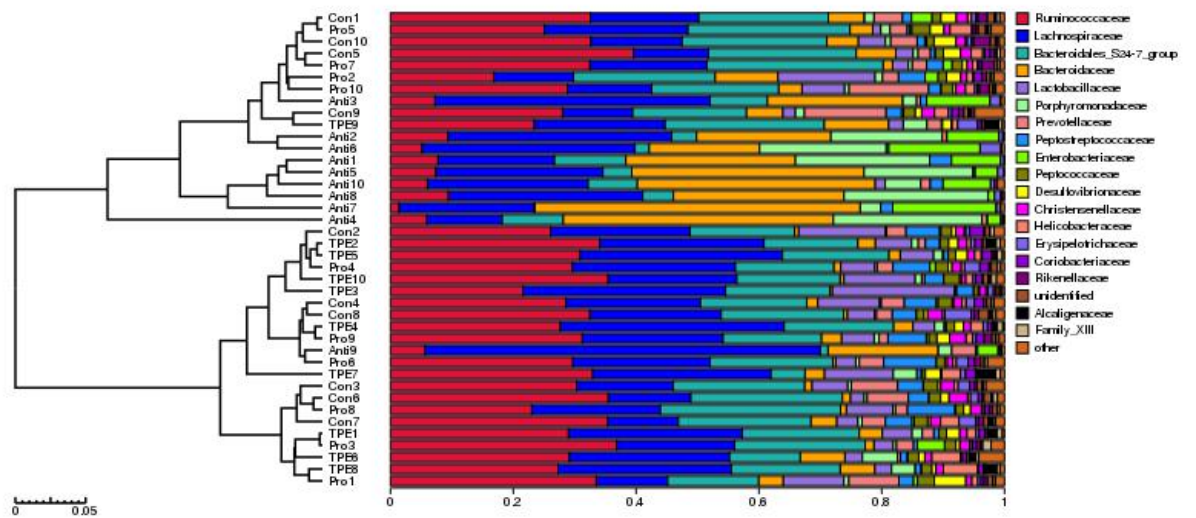

Figure S5. The relative abundance of bacterial family in each samples.



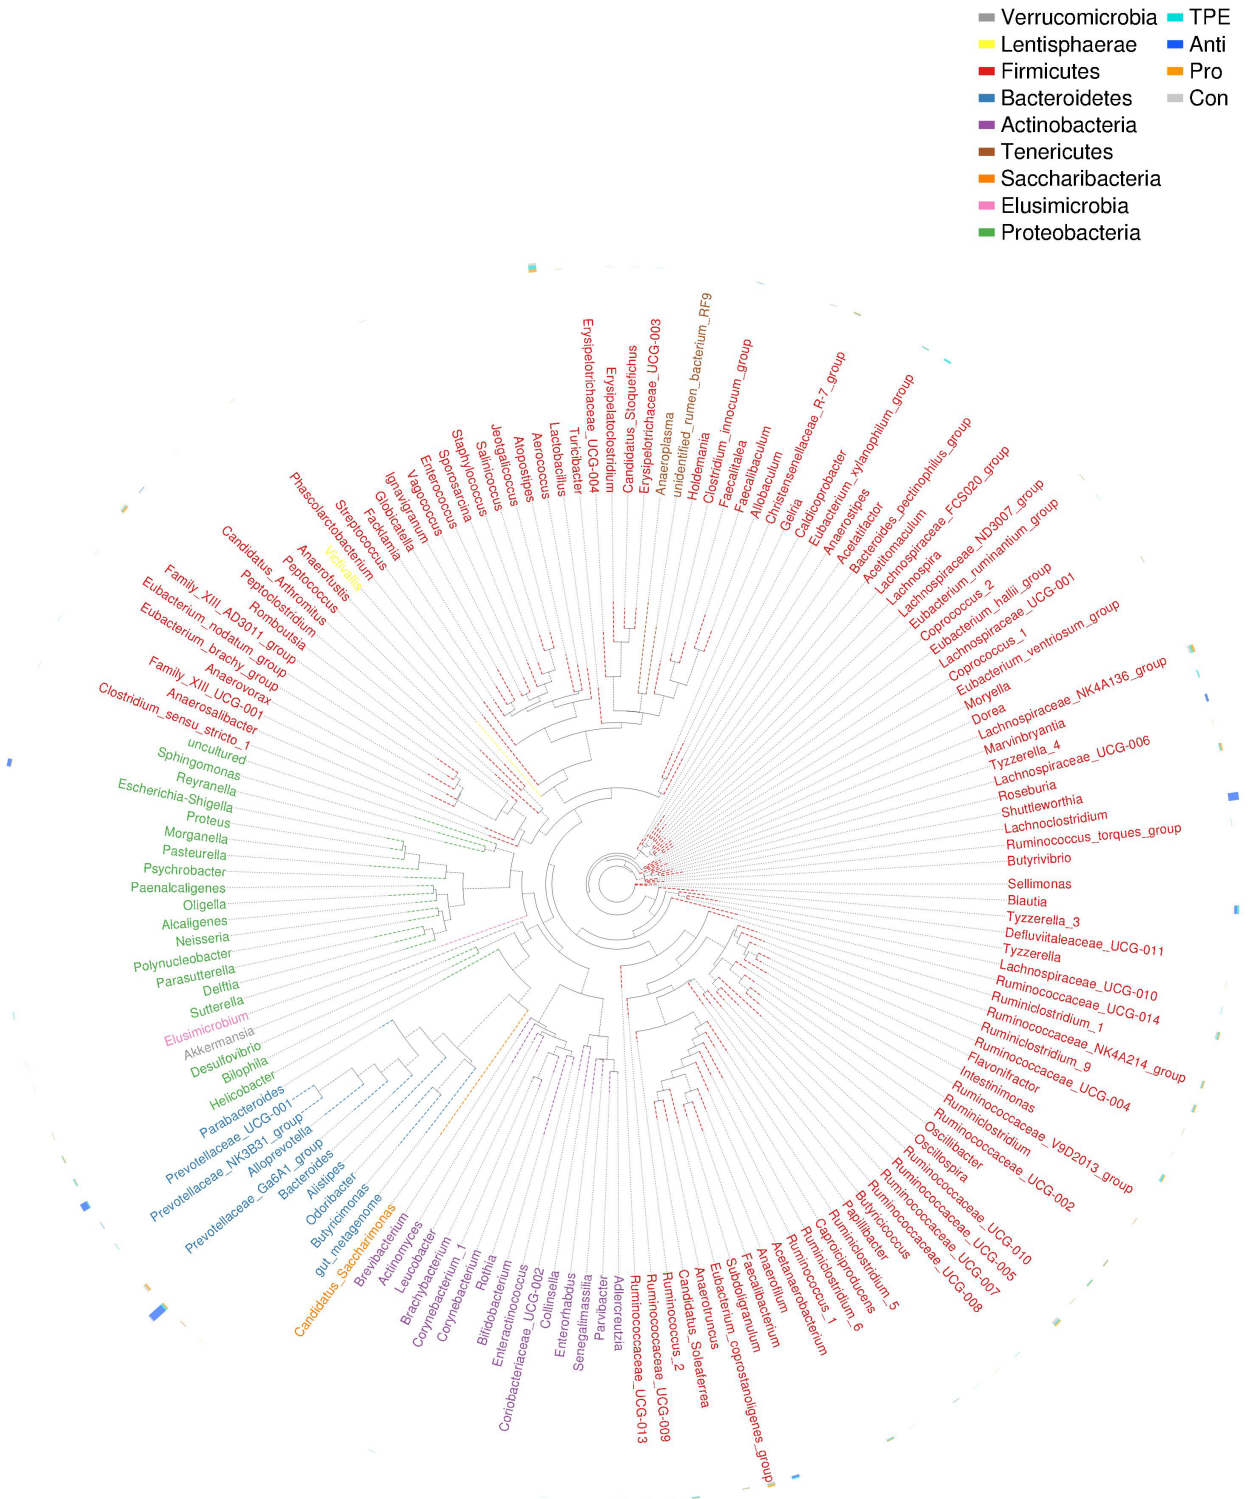

Figure S7. The genus\_phylogeny for each groups.



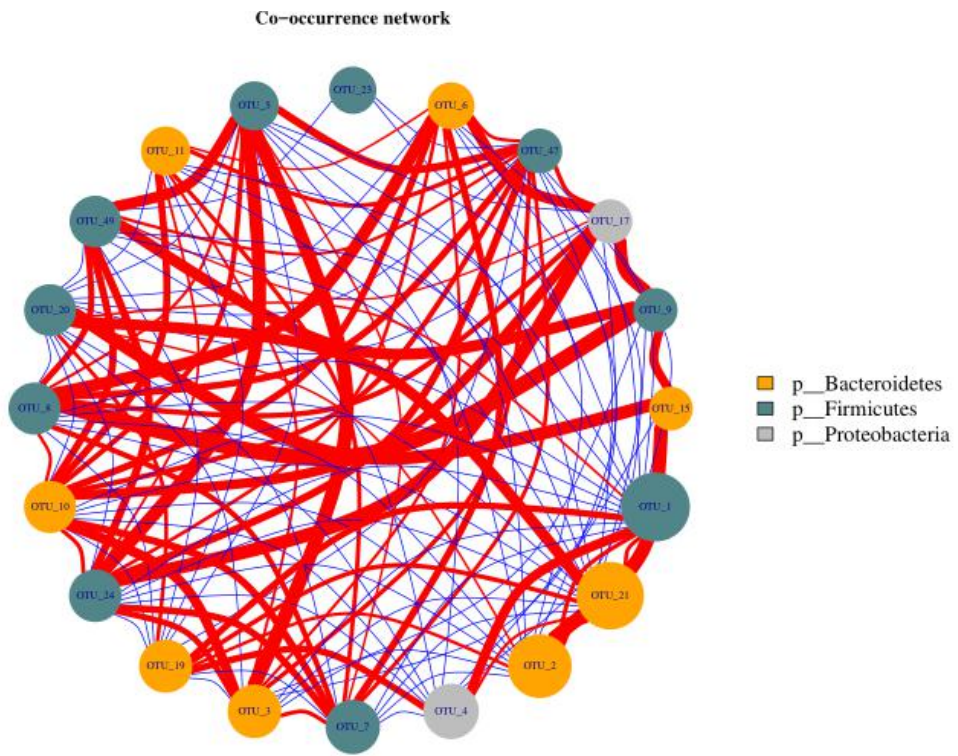

**Figure S8.** The co-occurrence network for OTUs
